# Supplementary material for: Deciphering porosity clogging at barrier interfaces in deep geological repositories for radioactive waste
Source: Copernicus journal article supplement (doi:10.5194/sand-1-181-2021), 2021-11-10

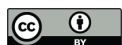

*Supplement of*

## **Deciphering porosity clogging at barrier interfaces in deep geological repositories for radioactive waste**

**Mara I. Lönartz et al.**

*Correspondence to:* Mara I. Lönartz (m.loenartz@fz-juelich.de)

The copyright of individual parts of the supplement might differ from the article licence.



# Deciphering porosity clogging at barrier interfaces in deep geological repositories for radioactive waste

Mara I. Lönartz<sup>1</sup>, Jenna Poonosamy<sup>1</sup>, Naila Ait-Mouheb<sup>1</sup>, Yuankai Yang<sup>1</sup>,  
Guido Deissmann<sup>1</sup>, Dirk Bosbach<sup>1</sup>

<sup>1</sup>Institute of Energy and Climate Research: Nuclear Waste Management and Reactor Safety (IEK-6),  
Forschungszentrum Jülich GmbH, 52425 Jülich, Germany  
email: m.loenartz@fz-juelich.de

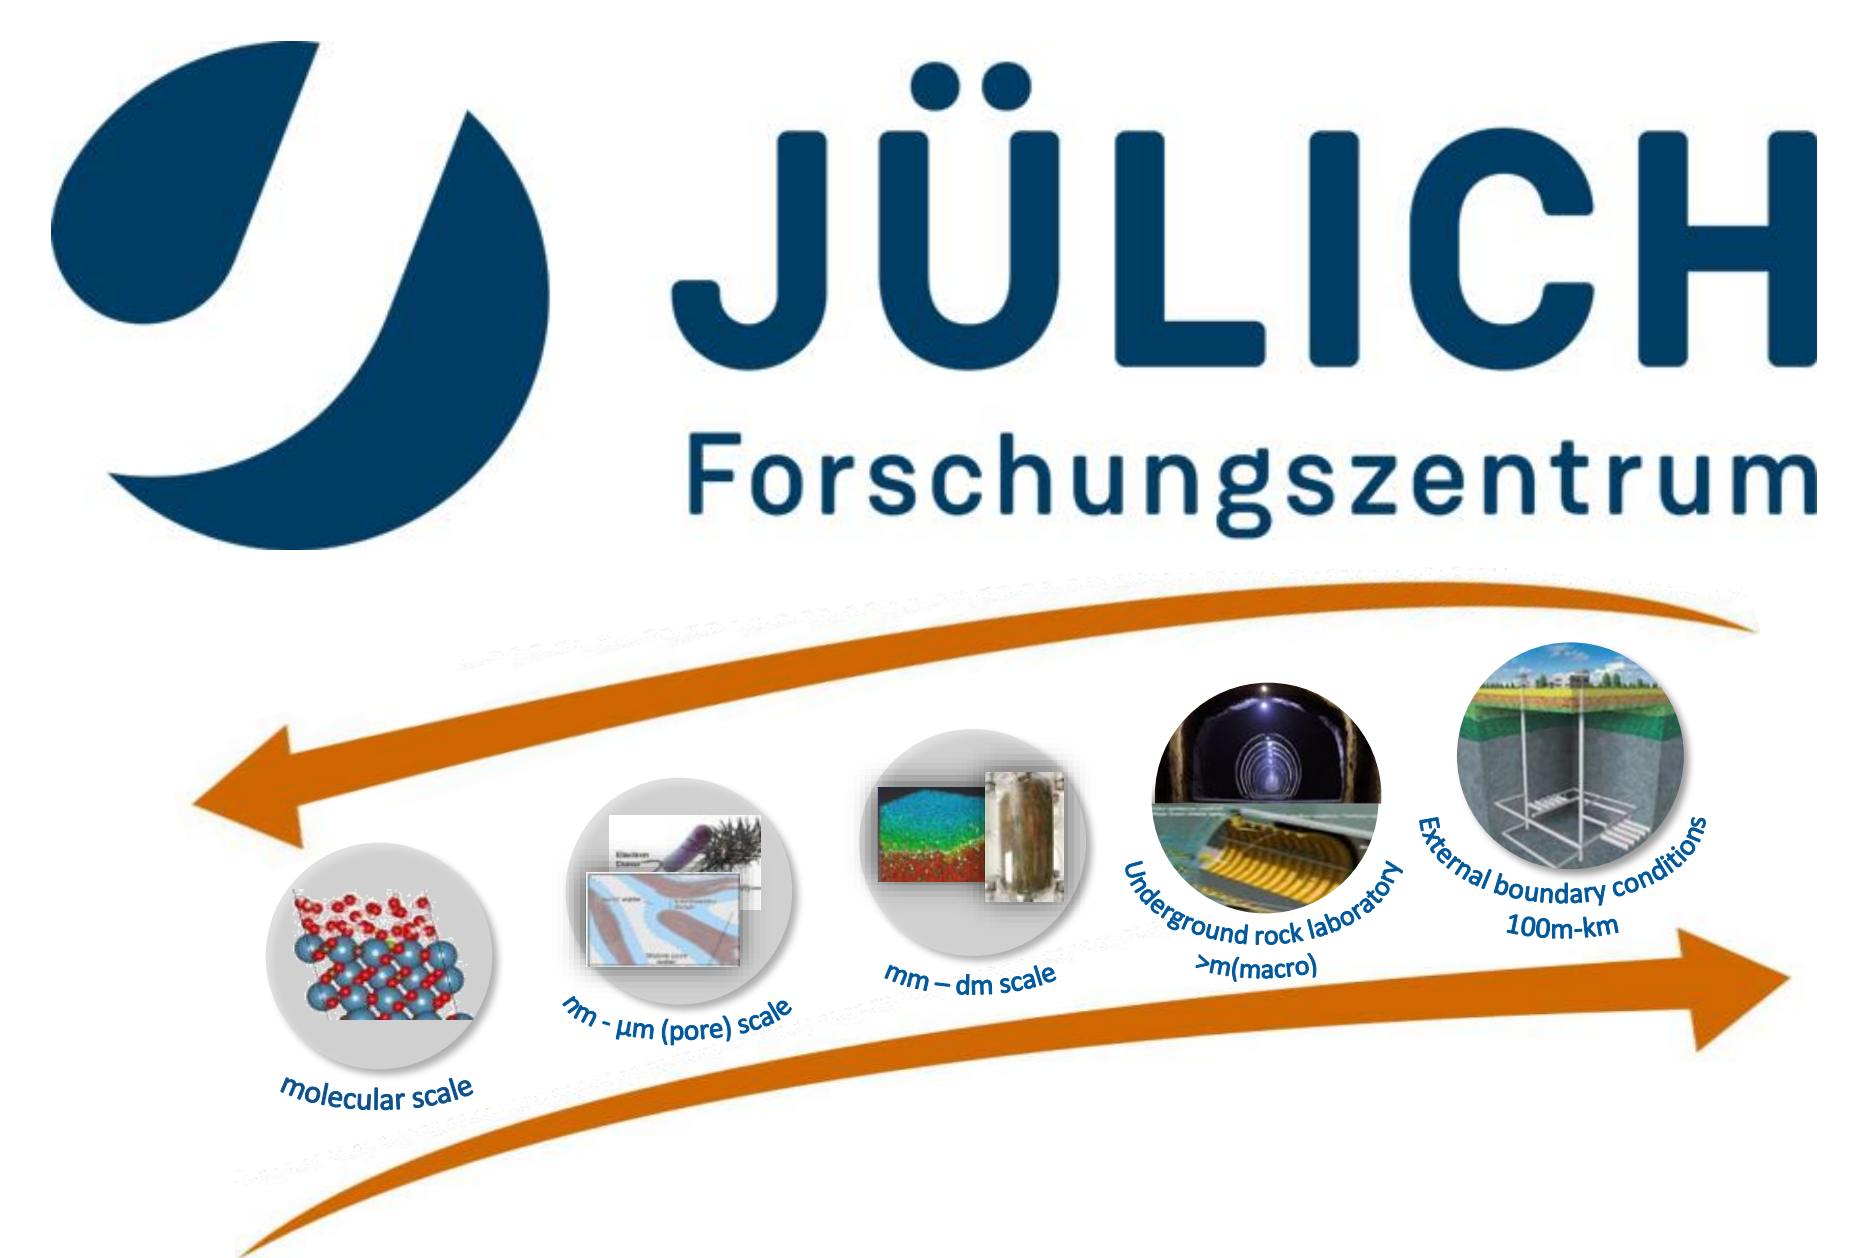

## MOTIVATION

Understanding geochemical processes at the pore-scale to develop upscaling approaches for implementation in continuum-scale reactive transport models

- A reliable safety assessment of a deep geological repository over time scales of several hundred thousand years requires a profound and comprehensive understanding of the complex coupled physical (thermal, hydraulic, mechanical), chemical and biogeochemical (THM/CB) processes that govern the long-term evolution of the repository system

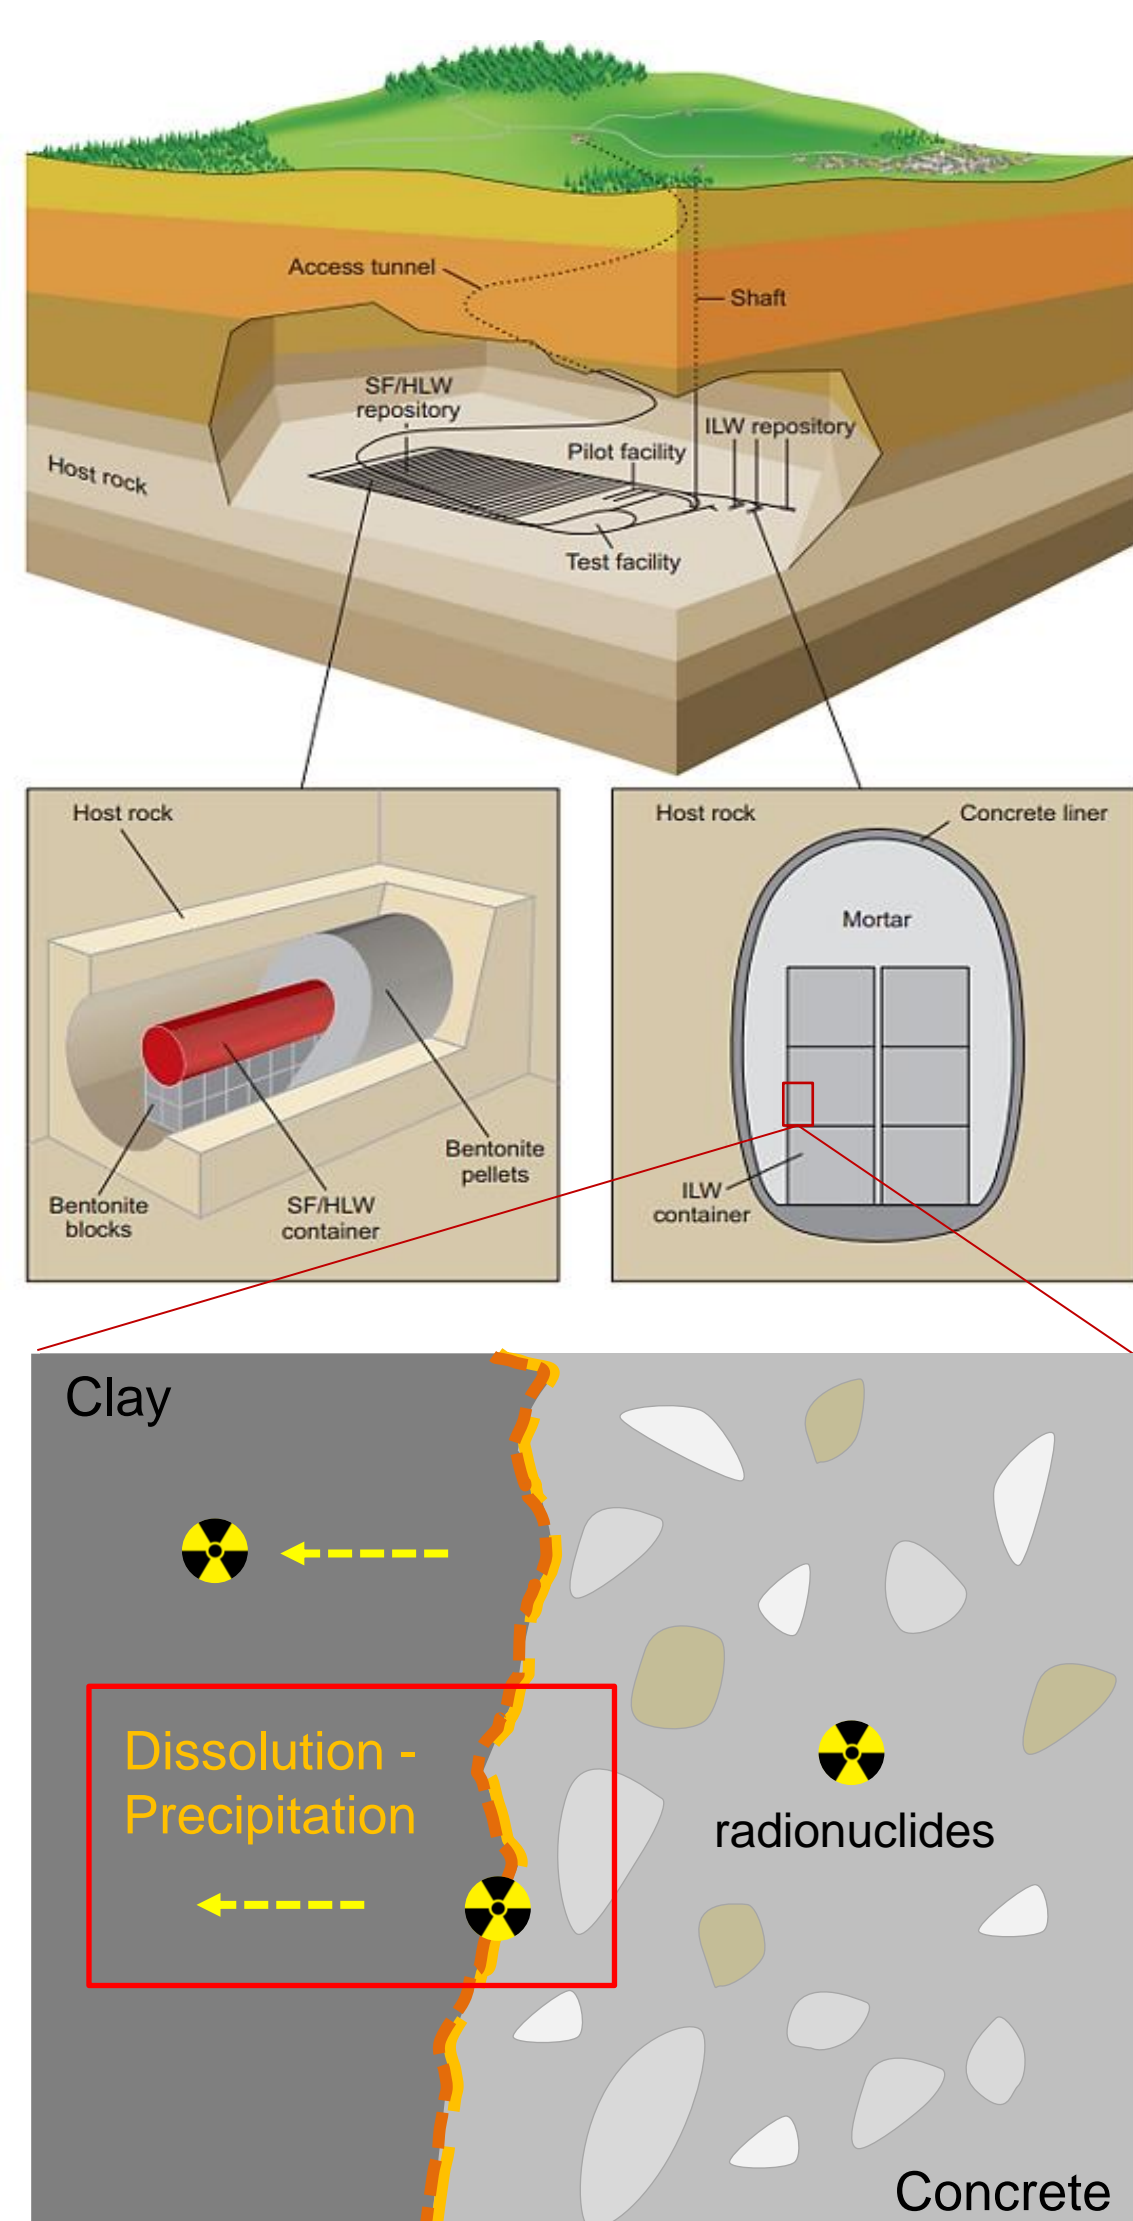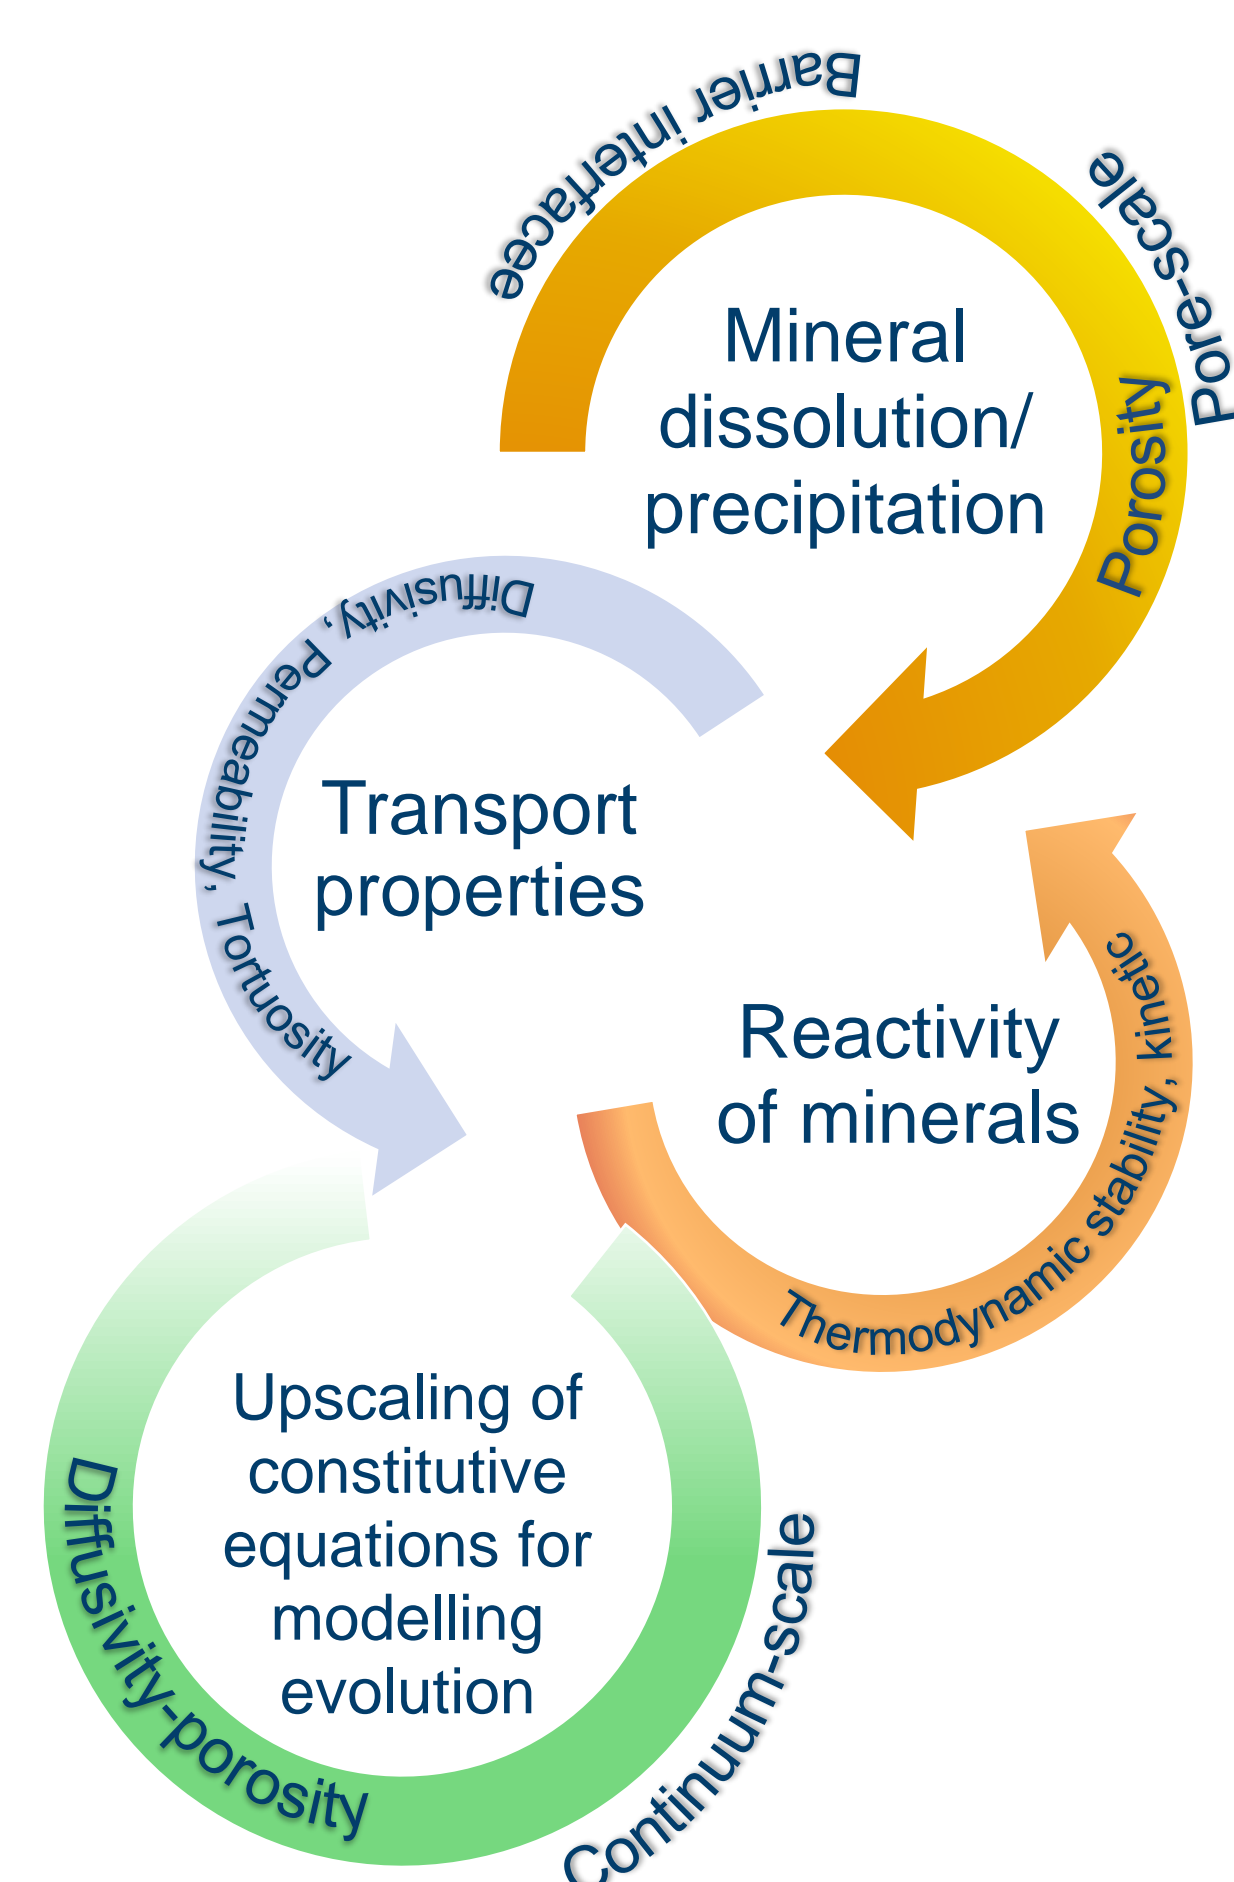

How does a significant reduction in porosity (porosity clogging) affect the diffusivity of porous media?

## EXPERIMENTAL APPROACH

“Lab on a chip” approach for the *in situ* quantification of changes in pore space and diffusivity

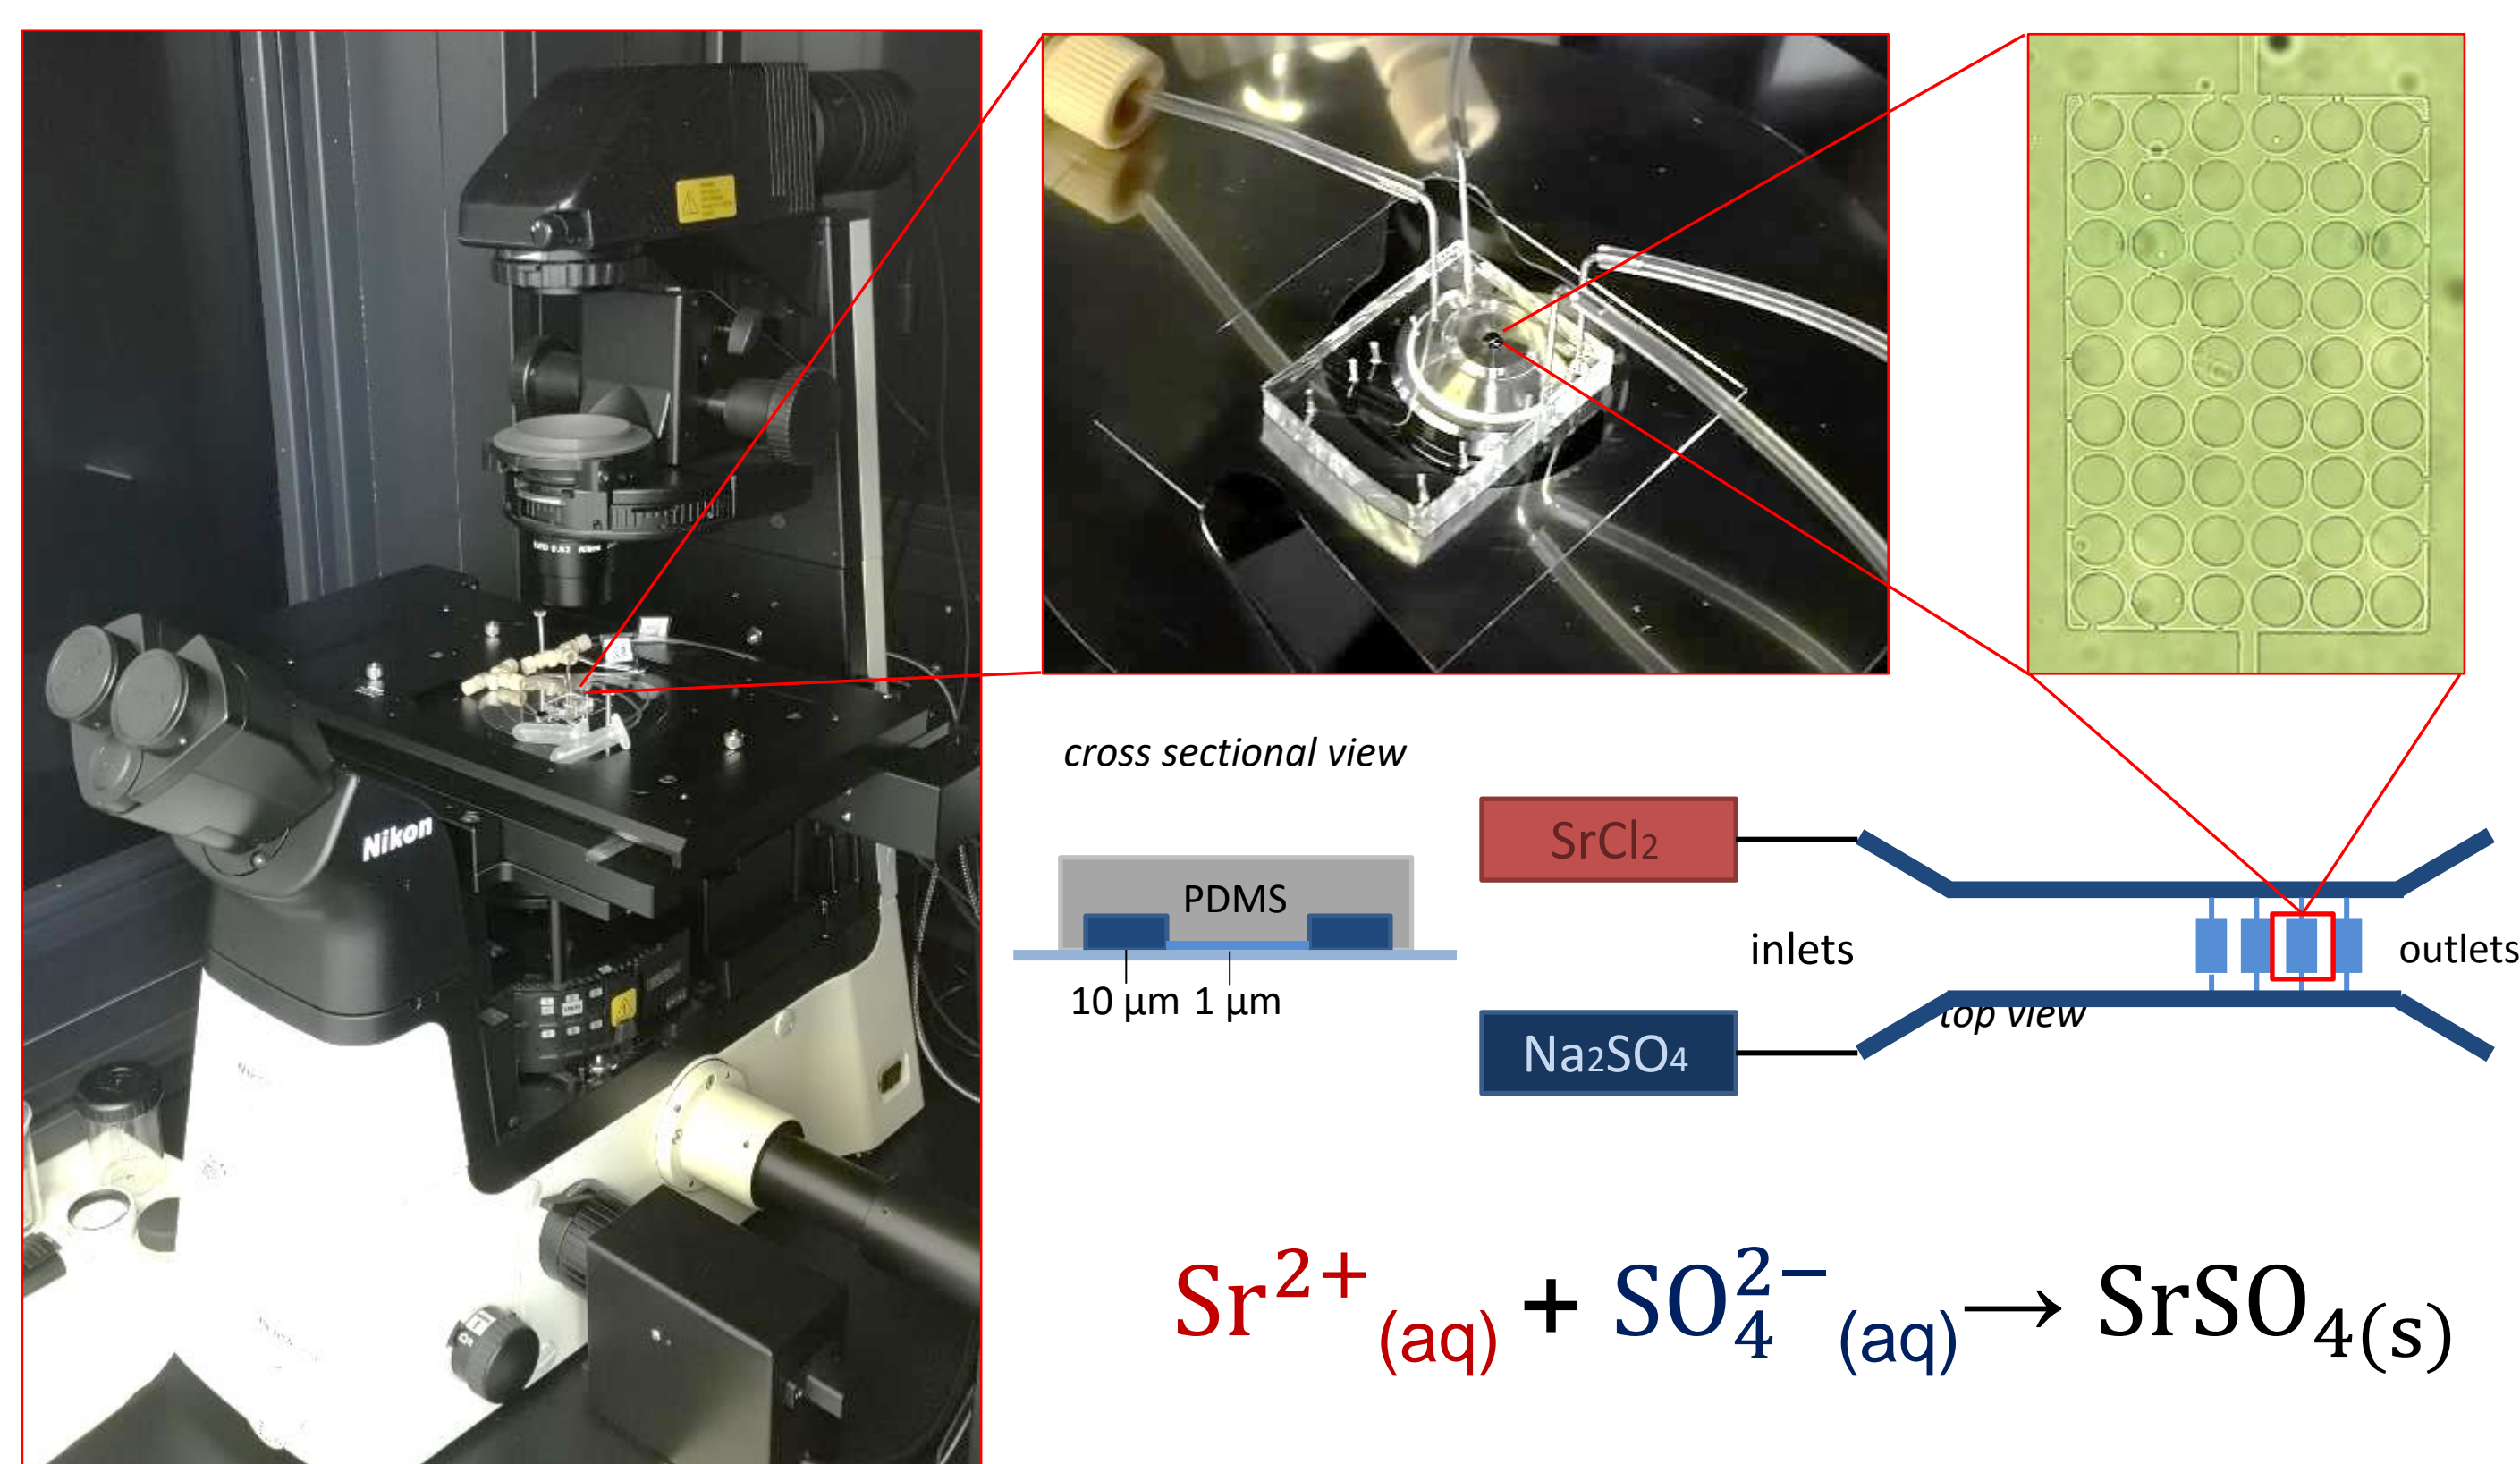

## MULTIPHYSICS MODELLING APPROACH

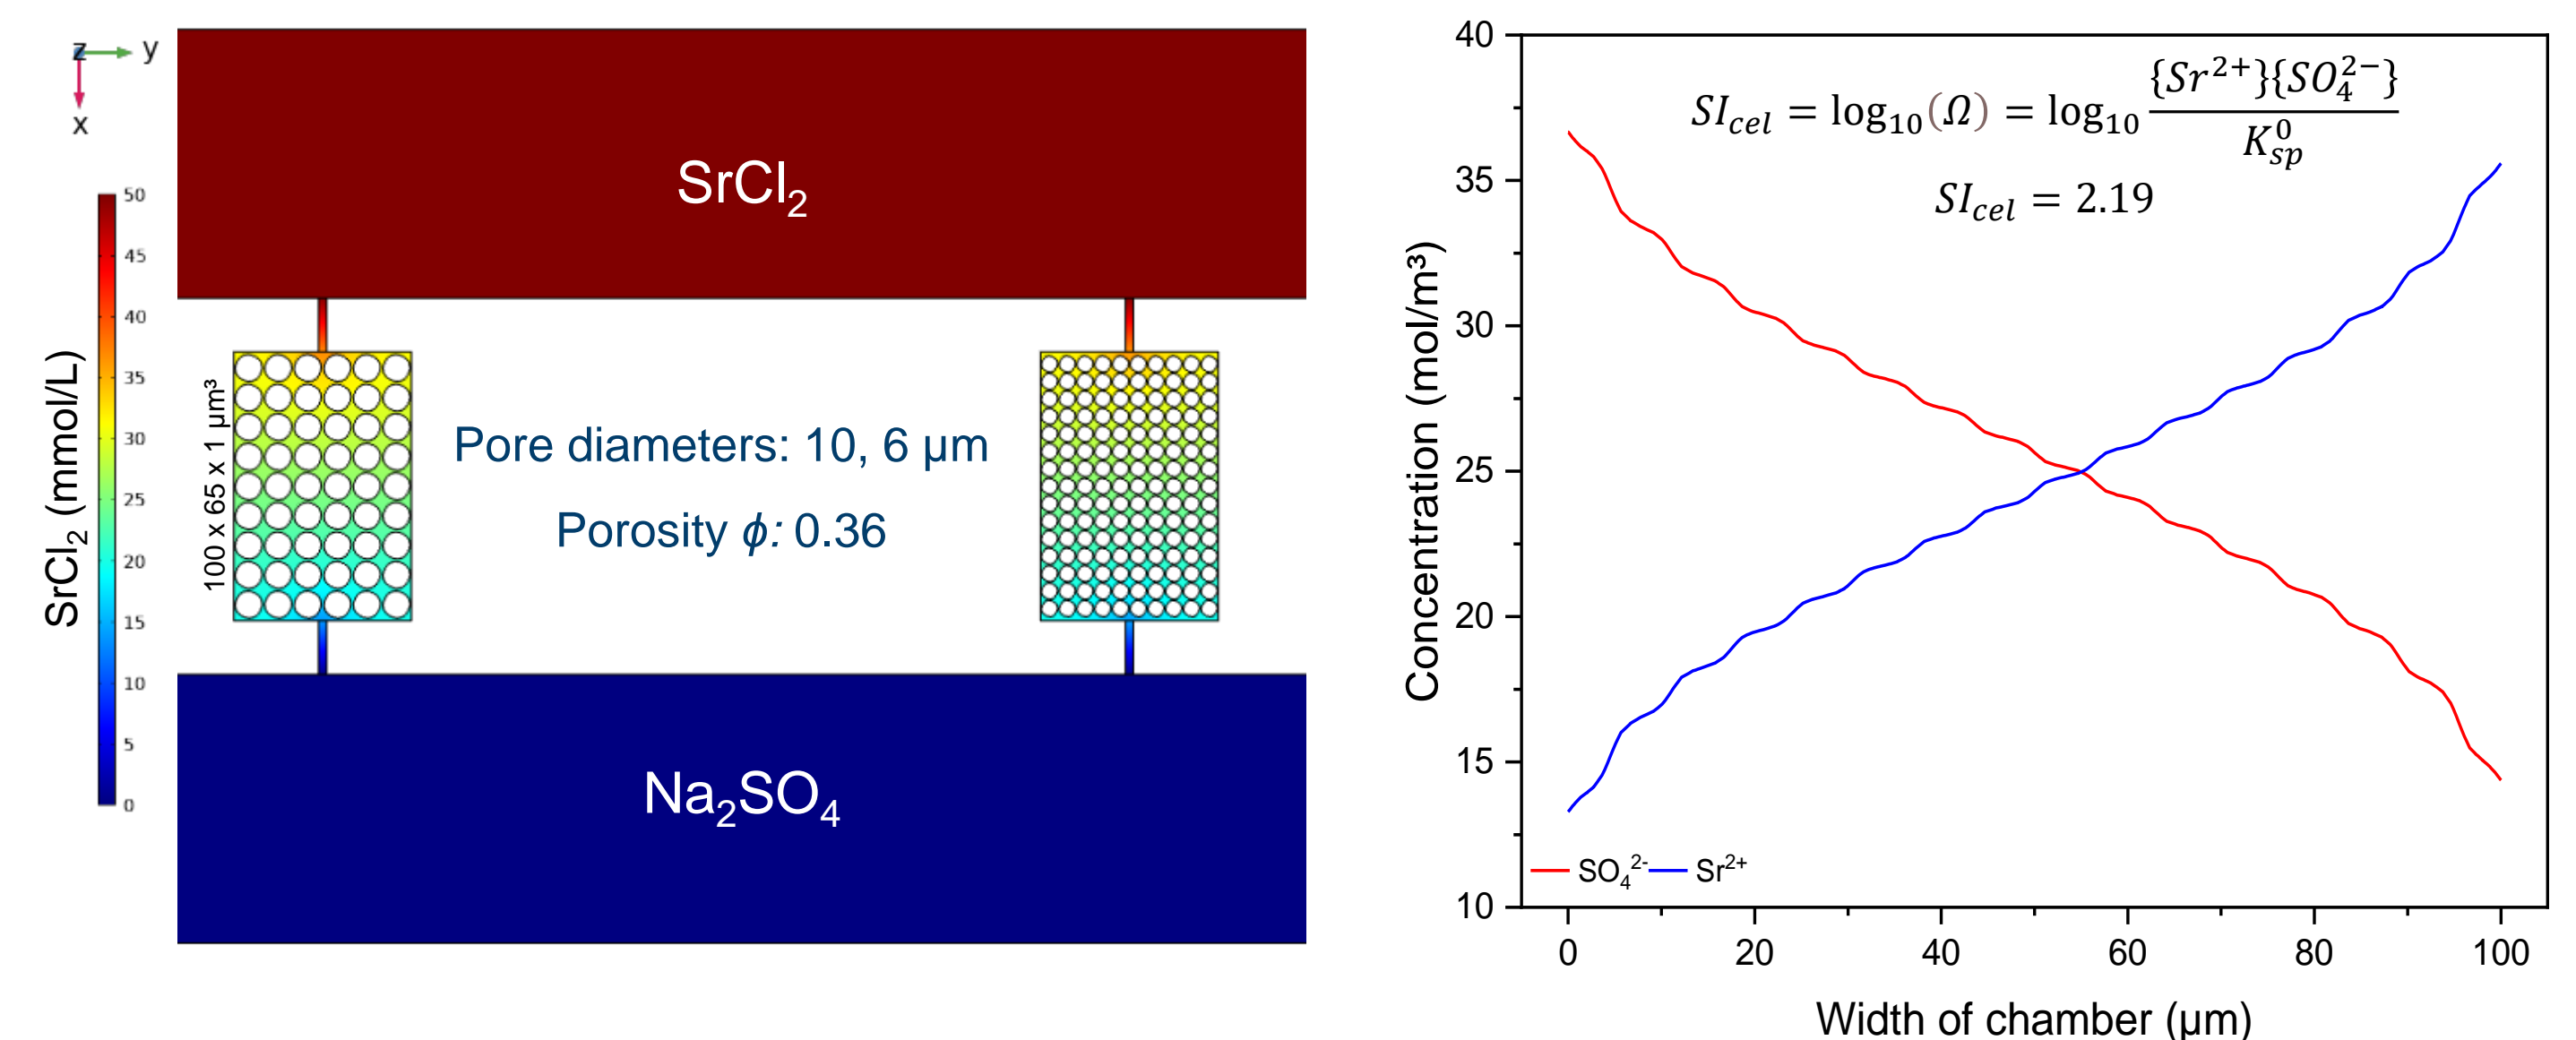

- Maximum of theoretical saturation index (SI) of 2.19 in the centre of the microfluidic chamber

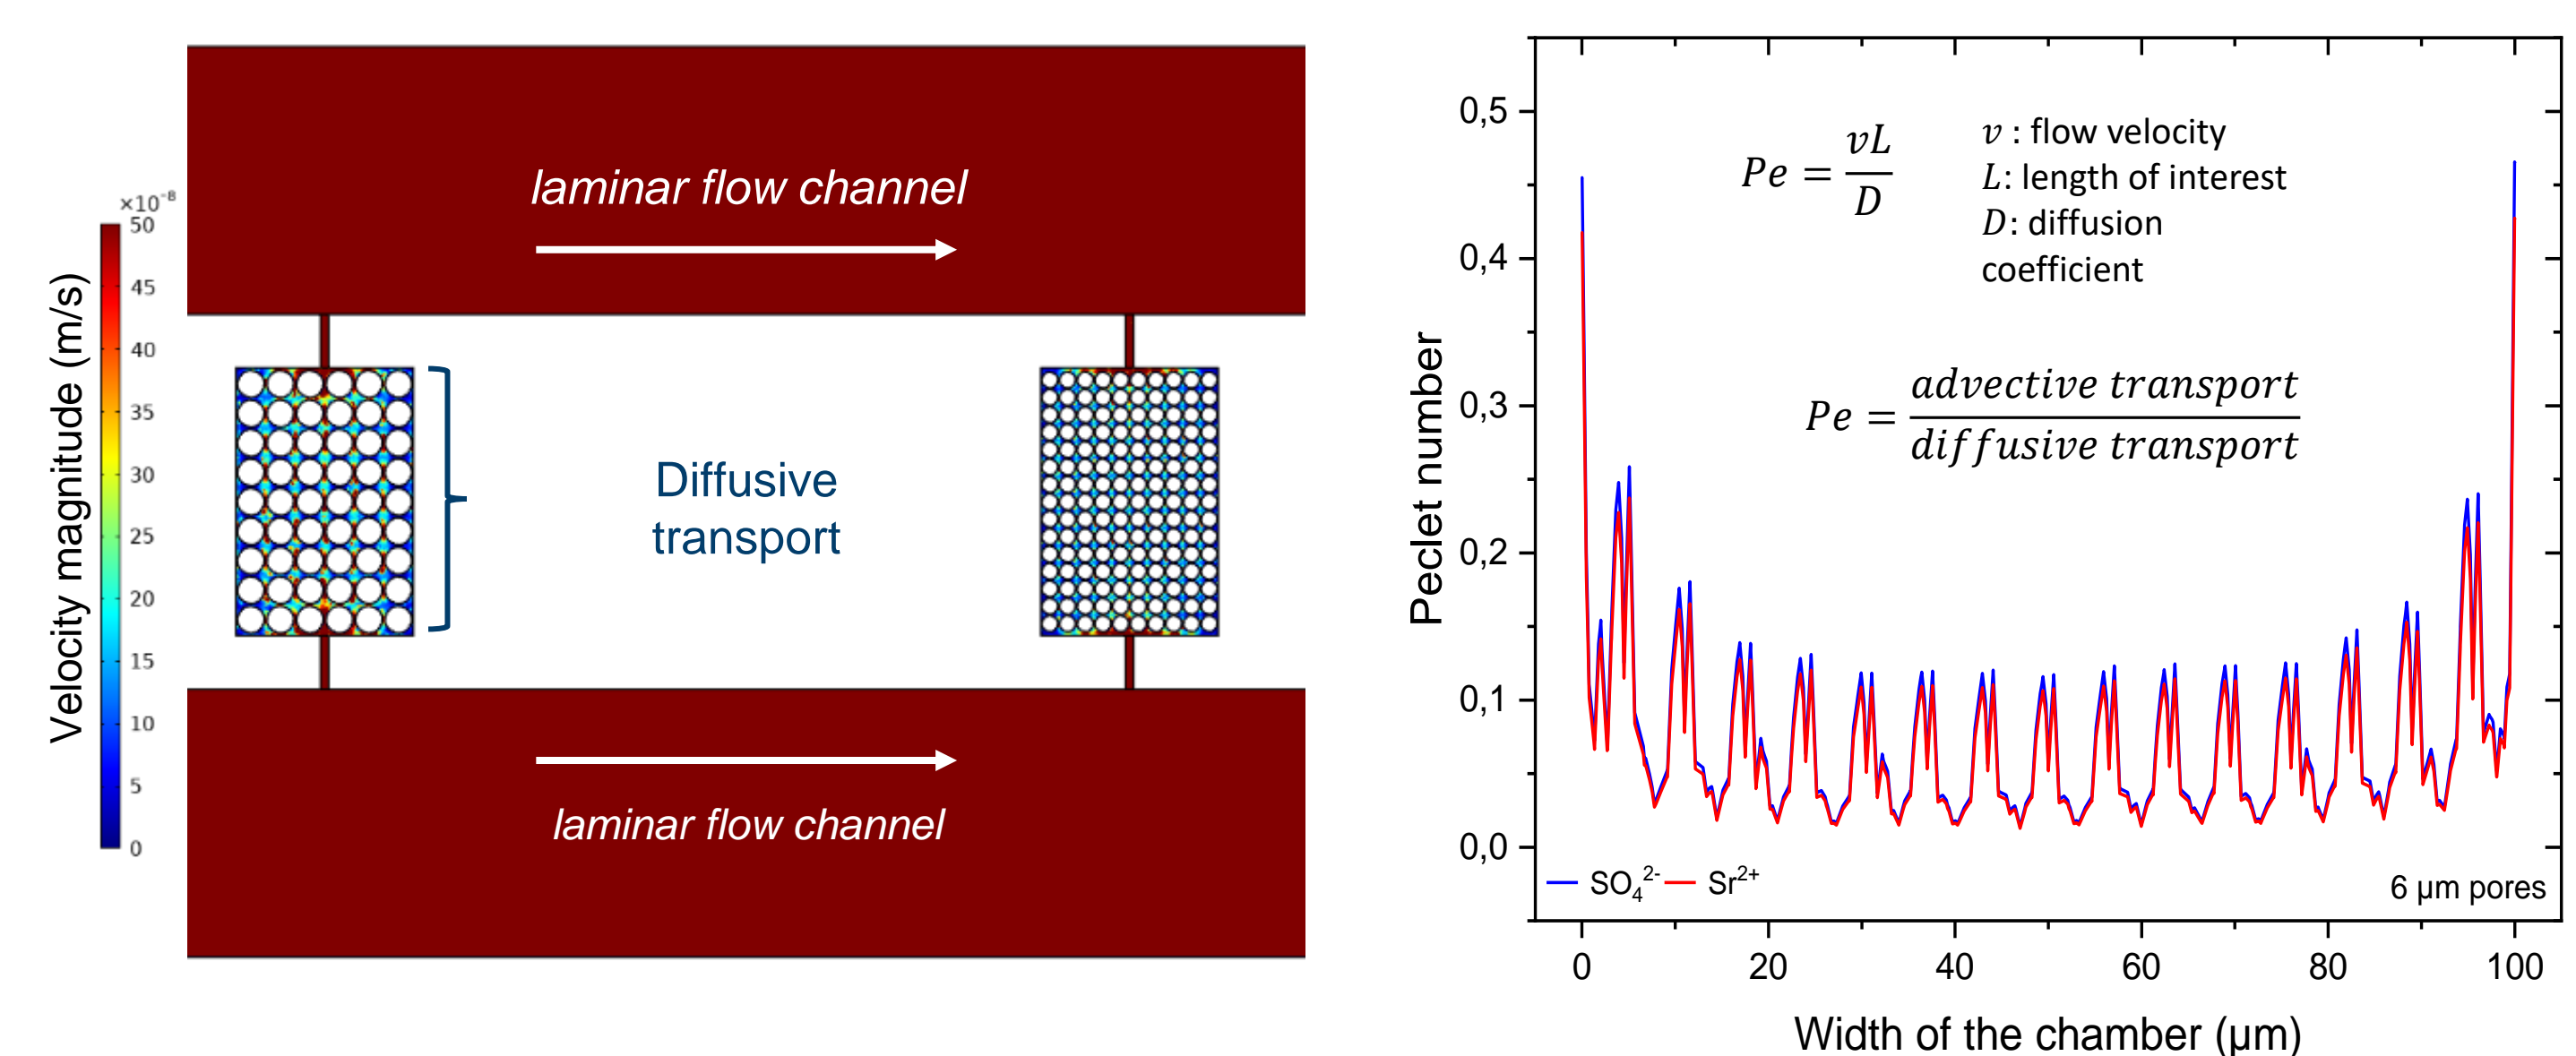

- Diffusive transport inside the microfluidic chambers

## FIRST MICROFLUIDIC EXPERIMENTS

- Start of crystal nucleation T = 0.33 h
- Clogging & injection of D<sub>2</sub>O T = 1.83 h

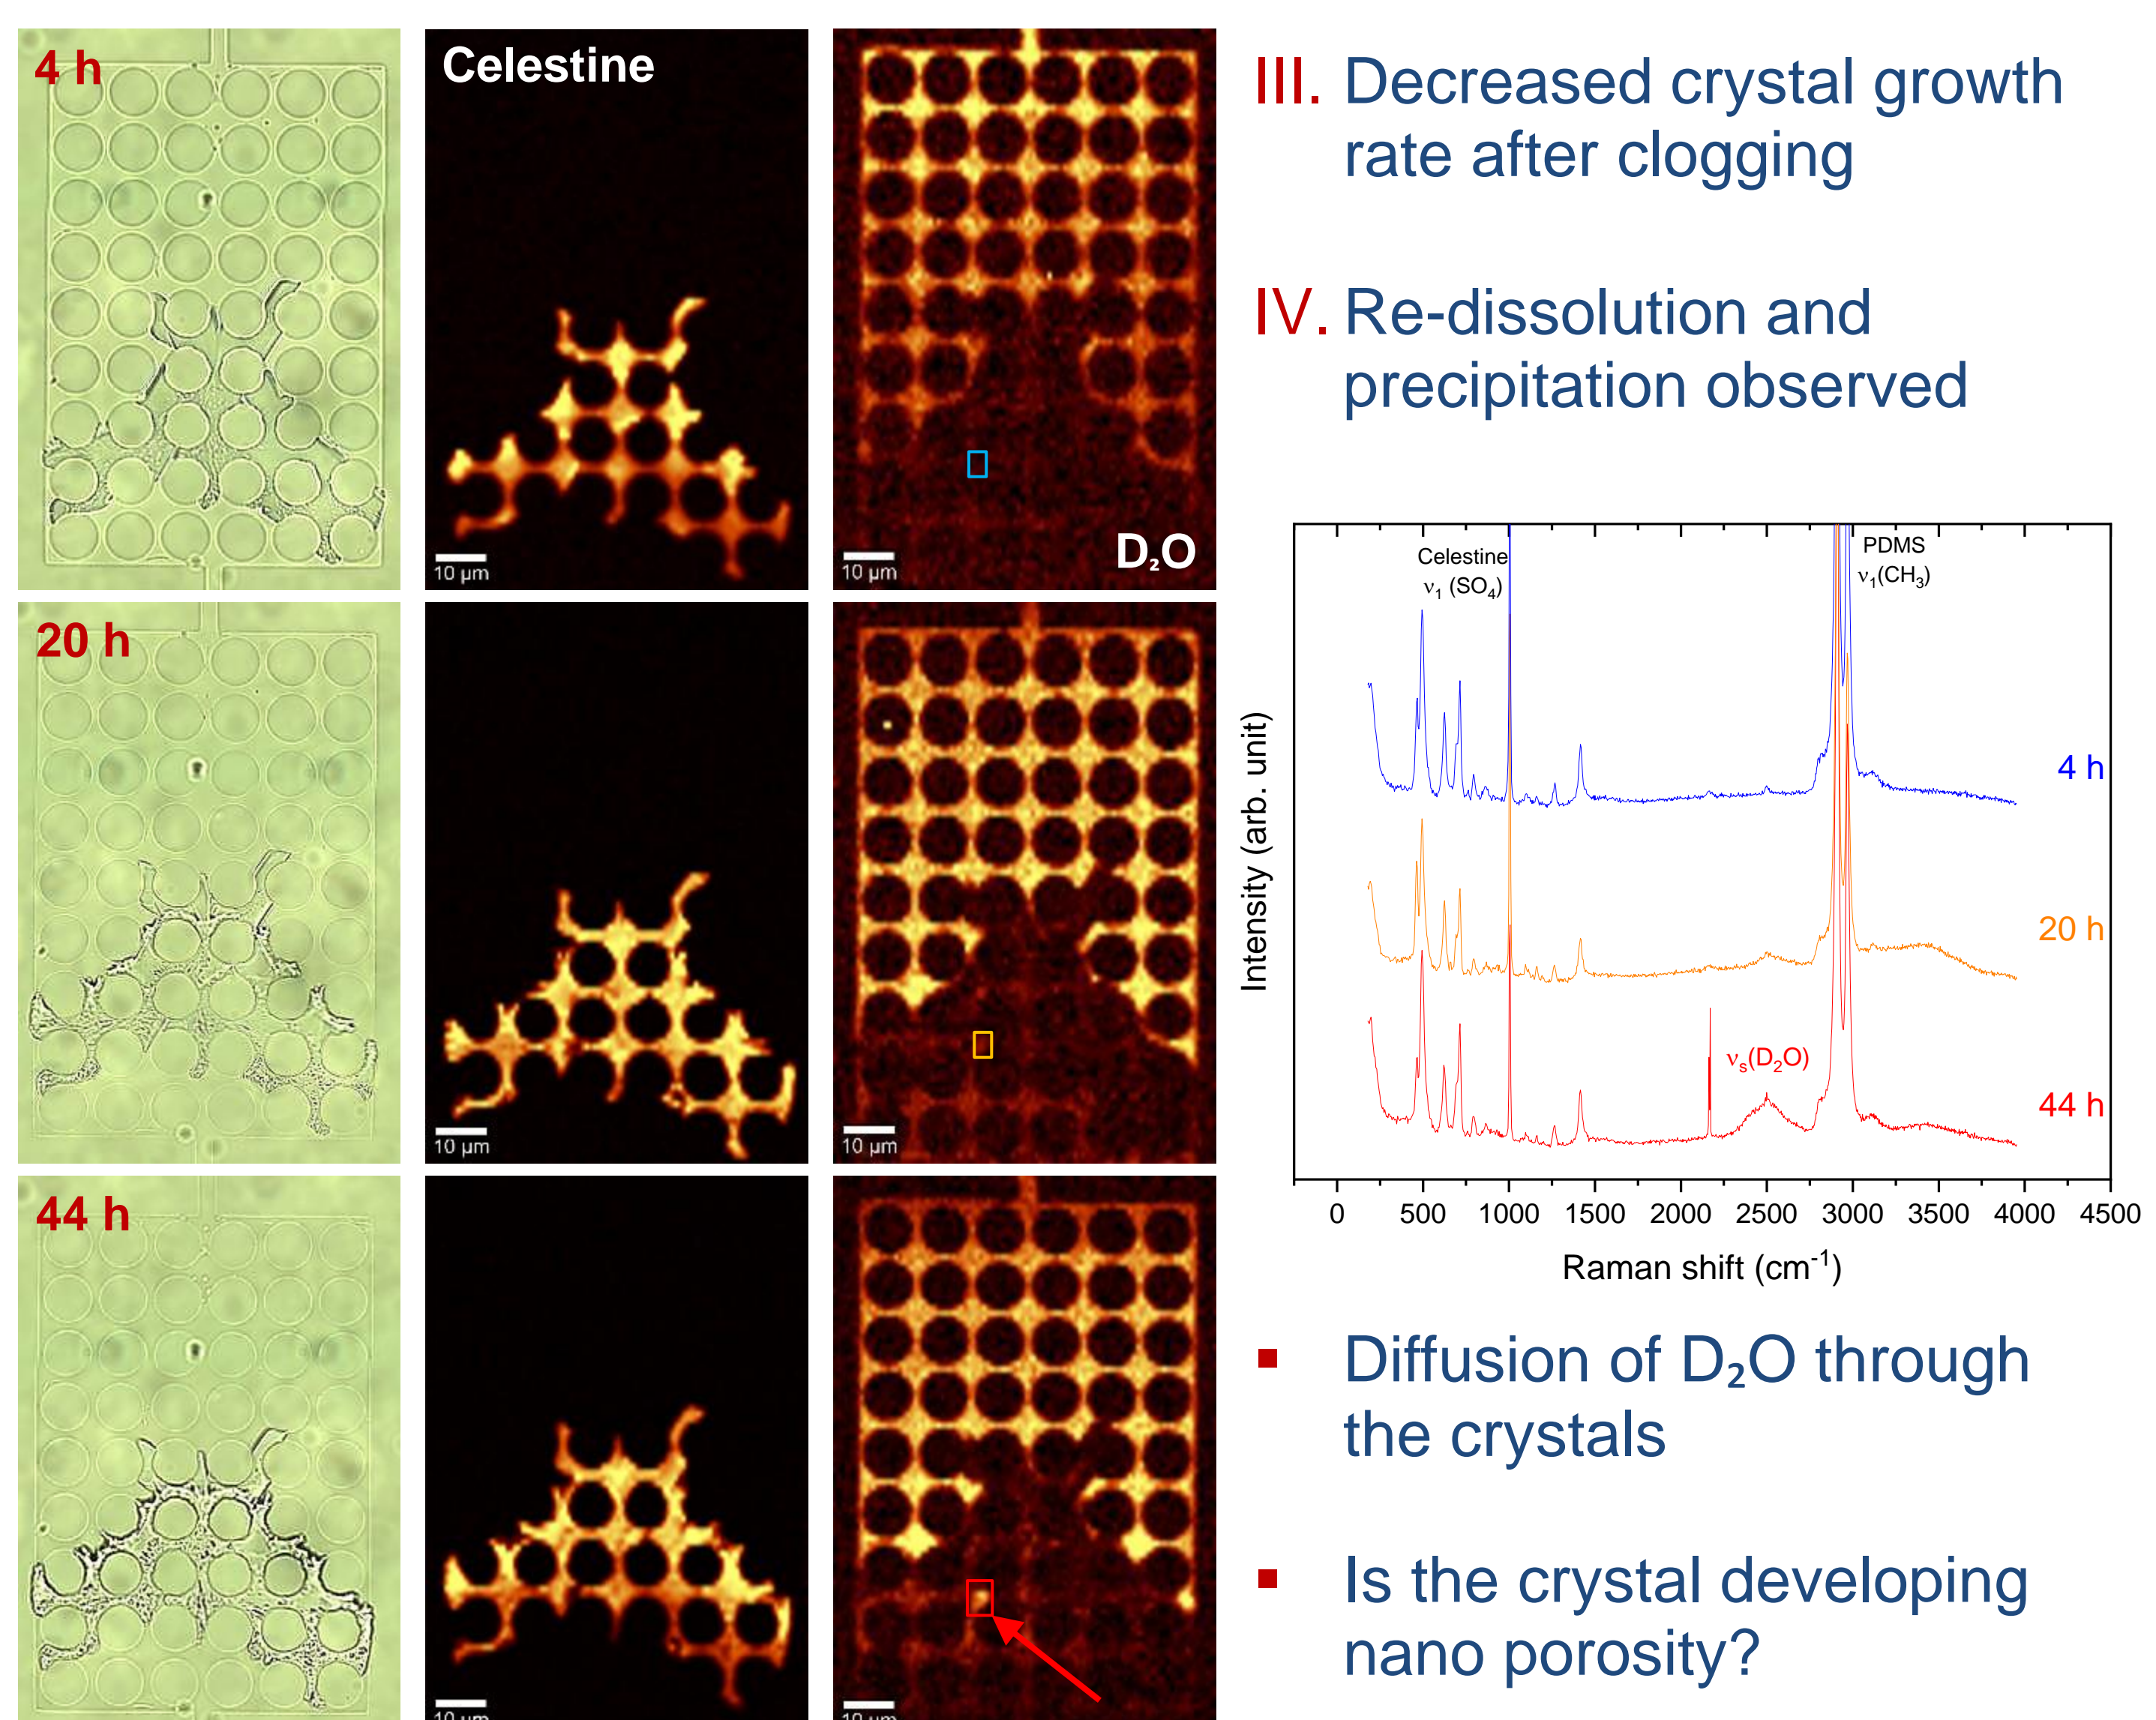

## OUTLOOK

- Complementary pore scale modelling to derive key relationships that describe changes in transport properties of porous media (e.g., clay rocks, cementitious materials, etc.) due to mineral precipitation induced porosity clogging

## ACKNOWLEDGEMENTS

The research leading to these results has received funding from the German Federal Ministry of Education and Research (BMBF, grant agreement 02NUK053A) and from the Initiative and Networking Fund of the Helmholtz Association (HGF grant SO-093) within the iCross project.

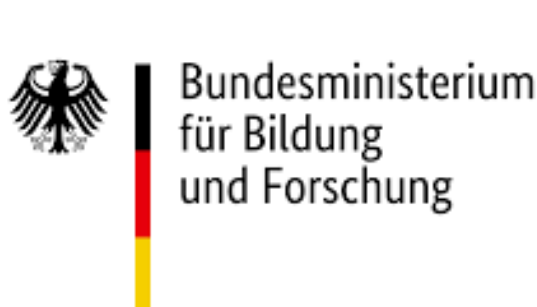

Supplement: Supplementary file 1 [file sand-1-181-2021-supplement.pdf]
